# Supplementary material
Source: PubMed Central journal article supplement (PMC5089815)
Supplement: NIHMS825387-supplement-Supplement_2.pdf [file NIHMS825387-supplement-Supplement_2.pdf]

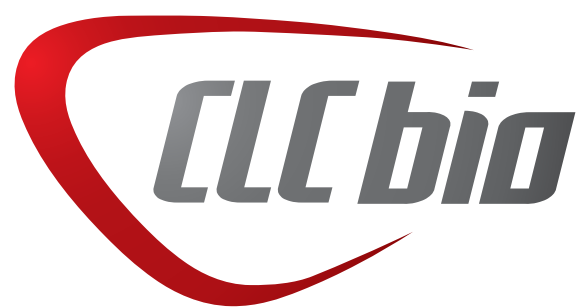

## Table of contents

|                                                 |   |
|-------------------------------------------------|---|
| 1. Mapping summary report .....                 | 3 |
| 1.1 Summary statistics .....                    | 3 |
| 1.2 Distribution of read length .....           | 3 |
| 1.3 Distribution of mapped read length .....    | 3 |
| 1.4 Distribution of un-mapped read length ..... | 3 |

# 1. Mapping summary report

## 1.1 Summary statistics

|                  | Count      | Percentage of reads | Average length | Number of bases |
|------------------|------------|---------------------|----------------|-----------------|
| References       | 2          | -                   | 11.270,00      | 22.540          |
| Mapped reads     | 5.004.634  | 24,85%              | 101,00         | 505.468.034     |
| Not mapped reads | 15.134.866 | 75,15%              | 101,00         | 1.528.621.466   |
| Total reads      | 20.139.500 | 100,00%             | 101,00         | 2.034.089.500   |

| Percentage of bases |
|---------------------|
| -                   |
| 24,85%              |
| 75,15%              |
| 100,00%             |

## 1.2 Distribution of read length

| Length | Count      |
|--------|------------|
| 101    | 20.139.500 |

## 1.3 Distribution of mapped read length

| Length | Count     |
|--------|-----------|
| 101    | 5.004.634 |

## 1.4 Distribution of un-mapped read length

| Length | Count      |
|--------|------------|
| 101    | 15.134.866 |
